# Supplementary material for: A Tracing Model for the Evolutionary Equilibrium of Octoploids
Source: Front Genet. 2022 Jan 28;12:794907. doi: 10.3389/fgene.2021.794907 (PMC8831725; doi:10.3389/fgene.2021.794907)
Supplement: Supplementary file 1 [file Table1.XLSX]

## Sheet: Table S1 Gennotype frequencies
Table S1 Genotype frequencies in the offspring generation of autooctoploids transmitted from the parental generation.
Parental Mating		Offspring Generation
Type	Frequency	AAAAAAAA	AAAAAAAa	AAAAAAaa	AAAAAaaa	AAAAaaaa	AAAaaaaa	Aaaaaaaa	Aaaaaaaa	aaaaaaaa
AAAAAAAA×AAAAAAAA	PAAAAAAAA2(t)	1	0	0	0	0	0	0	0	0
AAAAAAAA×AAAAAAAa	2PAAAAAAAA(t)PAAAAAAAa(t)	1/2+1/7*α	1/2-2/7*α	1/7*α	0	0	0	0	0	0
AAAAAAAA×AAAAAAaa	2PAAAAAAAA(t)PAAAAAAaa(t)	3/14+33/196*α	4/7-13/49*α	3/14+3/98*α	3/49*α	1/196*α	0	0	0	0
AAAAAAAA×AAAAAaaa	2PAAAAAAAA(t)PAAAAAaaa(t)	1/14+13/98*α	3/7-6/49*α	3/7-6/49*α	1/14+4/49*α	3/98*α	0	0	0	0
AAAAAAAA×AAAAaaaa	2PAAAAAAAA(t)PAAAAaaaa(t)	1/70+19/245*α	8/35+4/245*α	18/35-46/245*α	8/35+4/245*α	1/70+19/245*α	0	0	0	0
AAAAAAAA×AAAaaaaa	2PAAAAAAAA(t)PAAAaaaaa(t)	3/98*α	1/14+4/49*α	3/7-6/49*α	3/7-6/49*α	1/14+13/98*α	0	0	0	0
AAAAAAAA×AAaaaaaa	2PAAAAAAAA(t)PAAaaaaaa(t)	1/196*α	3/49*α	3/14+3/98*α	4/7-13/196*α	3/14+33/196*α	0	0	0	0
AAAAAAAA×Aaaaaaaa	2PAAAAAAAA(t)PAaaaaaaa(t)	0	0	1/7*α	1/2-2/7*α	1/2+1/7*α	0	0	0	0
AAAAAAAA×aaaaaaaa	2PAAAAAAAA(t)Paaaaaaaa(t)	0	0	0	0	1	0	0	0	0
AAAAAAAa×AAAAAAAa	PAAAAAAAa2(t)	1/4+1/49*α2+1/7*α	1/2-4/49*α2-1/7*α	1/4+6/49*α2-1/7*α	(-4/49)*α2+1/7*α	1/49*α2	0	0	0	0
AAAAAAAa×AAAAAAaa	2PAAAAAAAa(t)PAAAAAAaa(t)	3/28+33/1372*α2+45/392*α	11/28-59/686*α2-11/392*α	11/28+143/1372*α2-43/196*α	3/28-13/343*α2+13/196*α	(-17/1372)*α2+25/392*α	5/686*α2+1/392*α	1/1372*α2	0	0
AAAAAAAa×AAAAAaaa	2PAAAAAAAa(t)PAAAAAaaa(t)	1/28+13/686*α2+15/196*α	1/4-19/343*α2+9/196*α	3/7+25/686*α2-17/98*α	1/4+10/343*α2-1/14*α	1/28-25/686*α2+19/196*α	1/343*α2+5/196*α	3/686*α2	0	0
AAAAAAAa×AAAAaaaa	2PAAAAAAAa(t)PAAAAaaaa(t)	1/140+19/1715*α2+2/49*α	17/140-34/1715*α2+37/490*α	13/35-1/49*α2-37/490*α	13/35+20/343*α2-41/245*α	17/140-1/49*α2+2/35*α	1/140-34/1715*α2+33/490*α	19/1715*α2+1/490*α	0	0
AAAAAAAa×AAAaaaaa	2PAAAAAAAa(t)PAAAaaaaa(t)	3/686*α2+3/196*α	1/28+1/343*α2+13/196*α	1/4-25/686*α2+1/49*α	3/7+10/343*α2-17/98*α	1/4+25/686*α2-9/196*α	1/28-19/343*α2+3/28*α	13/686*α2+1/98*α	0	0
AAAAAAAa×AAaaaaaa	2PAAAAAAAa(t)PAAaaaaaa(t)	1/1372*α2+1/392*α	5/686*α2+13/392*α	3/28-17/1372*α2+15/196*α	11/28-13/343*α2-19/196*α	11/28+143/1372*α2-59/392*α	3/28-59/686*α2+41/392*α	33/1372*α2+3/98*α	0	0
AAAAAAAa×Aaaaaaaa	2PAAAAAAAa(t)PAaaaaaaa(t)	0	0	1/49*α2+1/14*α	1/4-4/49*α2	1/2+6/49*α2-1/7*α	1/4-4/49*α2	1/49*α2+1/14*α	0	0
AAAAAAAa×aaaaaaaa	2PAAAAAAAa(t)Paaaaaaaa(t)	0	0	0	0	1/2+1/7*α	1/2-2/7*α2	1/7*α	0	0
AAAAAAaa×AAAAAAaa	PAAAAAAaa2(t)	9/196+1089/38416*α2+99/1372*α	12/49-429/4802*α2+27/343*α	41/98+775/9604*α2-299/1372*α	12/49+3/686*α2-18/343*α	9/196-573/19208*α2+117/1372*α	5/4802*α2+11/343*α	39/9604*α2+3/1372*α	3/4802*α2	1/38416*α2
AAAAAAaa×AAAAAaaa	2PAAAAAAaa(t)PAAAAAaaa(t)	3/196+429/19208*α2+11/2744*α	13/98-134/2401*α2+141/1372*α	69/196+153/9604*α2-147/1372*α	69/196+243/4802*α2-447/2744*α	13/98-65/2401*α2+131/2744*α	3/196-33/2401*α2+45/686*α	51/9604*α2+9/686*α	11/4802*α2+1/2744*α	3/19208*α2
AAAAAAaa×AAAAaaaa	2PAAAAAAaa(t)PAAAAaaaa(t)	3/980+627/48020*α2+261/13720*α	2/35-214/12005*α2+283/3430*α	239/980-403/12005*α2+83/6860*α	96/245+694/12005*α2-653/3430*α	239/980+3/686*α2-293/6860*α	2/35-54/1715*α2+41/490*α	3/980+29/12005*α2+33/980*α	58/12005*α2+1/490*α	19/48020*α2+1/13720*α
AAAAAAaa×AAAaaaaa	2PAAAAAAaa(t)PAAAaaaaa(t)	99/19208*α2+9/1372*α	3/196+27/4802*α2+129/2744*α	13/98-397/9604*α2+55/686*α	69/196+39/2401*α2-81/686*α	69/196+135/2401*α2-417/2744*α	13/98-221/4802*α2+193/2744*α	3/196-39/9604*α2+81/1372*α	18/2401*α2+9/1372*α	13/19208*α2+1/2744*α
AAAAAAaa×AAaaaaaa	2PAAAAAAaa(t)PAAaaaaaa(t)	33/38416*α2+3/2744*α	43/4802*α2+11/686*α	9/196-15/1372*α2+27/343*α	12/49-243/4802*α2+9/686*α	41/98+1987/19208*α2-299/1372*α	12/49-243/4802*α2+9/686*α	9/196-15/1372*α2+27/343*α	43/4802*α2+11/686*α	33/38416*α2+3/2744*α
AAAAAAaa×Aaaaaaaa	2PAAAAAAaa(t)PAaaaaaaa(t)	0	0	33/1372*α2+3/98*α	3/28-59/686*α2+41/392*α	11/28+143/1372*α2-59/392*α	11/28-13/343*α2-19/196*α	3/28-17/1372*α2+15/196*α	5/686*α2+13/392*α	1/1372*α2+1/392*α
AAAAAAaa×aaaaaaaa	2PAAAAAAaa(t)Paaaaaaaa(t)	0	0	0	0	3/14+33/196*α	4/7-13/196*α	3/14+3/98*α	3/49*α	1/196*α
AAAAAaaa×AAAAAaaa	PAAAAAaaa2(t)	1/196+169/9604*α2+13/686*α	3/49-78/2401*α2+33/343*α	12/49-42/2401*α2-3/343*α	37/98+124/2401*α2-123/686*α	12/49+15/4802*α2-33/686*α	3/49-66/2401*α2+27/343*α	1/196-2/2401*α2+13/343*α	12/2401*α2+3/686*α	9/9604*α2
AAAAAaaa×AAAAaaaa	2PAAAAAaaa(t)PAAAAaaaa(t)	1/980+247/24010*α2+51/6860*α	11/490-88/12005*α2+108/1715*α	69/490-437/12005*α2+16/245*α	47/140+354/12005*α2-433/3430*α	47/140+12/343*α2-67/490*α	69/490-316/12005*α2+79/1715*α	11/490-167/12005*α2+23/343*α	1/980+82/12005*α2+47/3430*α	57/24010*α2+3/6860*α
AAAAAaaa×AAAaaaaa	2PAAAAAaaa(t)PAAAaaaaa(t)	39/9604*α2+3/1372*α	1/196+17/2401*α2+39/1372*α	3/49-72/2401*α2+30/343*α	12/49-3/343*α2-39/1372*α	37/98+265/4802*α2-123/686*α	12/49-3/343*α2-39/1372*α	3/49-72/2401*α2+30/343*α	1/196+17/2401*α2+39/1372*α	39/9604*α2+3/1372*α
AAAAAaaa×AAaaaaaa	2PAAAAAaaa(t)PAAaaaaaa(t)	13/19208*α2+1/2744*α	18/2401*α2+9/1372*α	3/196-39/9604*α2+81/1372*α	13/98-221/4802*α2+193/2744*α	69/196+135/2401*α2-417/2744*α	69/196+39/2401*α2-81/686*α	13/98-397/9604*α2+55/686*α	3/196+27/4802*α2+129/2744*α	99/19208*α2+9/1372*α
AAAAAaaa×Aaaaaaaa	2PAAAAAaaa(t)PAaaaaaaa(t)	0	0	13/686*α2+1/98*α	1/28-19/343*α2+3/28*α	1/4+25/686*α2-9/196*α	3/7+10/343*α2-17/98*α	1/4-25/686*α2+1/49*α	1/28+1/343*α2+13/196*α	3/686*α2+3/196*α
AAAAAaaa×aaaaaaaa	2PAAAAAaaa(t)Paaaaaaaa(t)	0	0	0	0	1/14+13/98*α	3/7-6/49*α	3/7-6/49*α	1/14+4/49*α	3/98*α
AAAAaaaa×AAAAaaaa	PAAAAaaaa2(t)	1/4900+361/60025*α2+19/8575*α	8/1225+152/60025*α2+44/1225*α	82/1225-1732/60025*α2+702/8575*α	296/1225-216/60025*α2-284/8575*α	181/490+82/1715*α2-298/1715*α	296/1225-216/60025*α2-284/8575*α	82/1225-1732/60025*α2+702/8575*α	8/1225+152/60025*α2+44/1225*α	1/4900+361/60025*α2+19/8575*α
AAAAaaaa×AAAaaaaa	2PAAAAaaaa(t)PAAAaaaaa(t)	57/24010*α2+3/6860*α	1/980+82/12005*α2+47/3430*α	11/490-167/12005*α2+23/343*α	69/490-316/12005*α2+79/1715*α	47/140+12/343*α2-67/490*α	47/140+354/12005*α2-433/3430*α	69/490-437/12005*α2+16/245*α	11/490-88/12005*α2+108/1715*α	1/980+247/24010*α2+51/6860*α
AAAAaaaa×AAaaaaaa	2PAAAAaaaa(t)PAAaaaaaa(t)	19/48020*α2+1/13720*α	58/12005*α2+1/490*α	3/980+29/12005*α2+33/980*α	2/35-54/1715*α2+41/490*α	239/980+3/686*α2-293/6860*α	96/245+694/12005*α2-653/3430*α	239/980-403/12005*α2+83/6860*α	2/35-214/12005*α2+283/3430*α	3/980+627/48020*α2+261/13720*α
AAAAaaaa×Aaaaaaaa	2PAAAAaaaa(t)PAaaaaaaa(t)	0	0	19/1715*α2+1/490*α	1/140-34/1715*α2+33/490*α	17/140-1/49*α2+2/35*α	13/35+20/343*α2-41/245*α	13/35-1/49*α2-37/490*α	17/140-34/1715*α2+37/490*α	1/140+19/1715*α2+2/49*α
AAAAaaaa×aaaaaaaa	2PAAAAaaaa(t)Paaaaaaaa(t)	0	0	0	0	1/70+19/245*α	8/35+4/245*α	18/35-46/245*α	8/35+4/245*α	1/70+19/245*α
AAAaaaaa×AAAaaaaa	PAAAaaaaa2(t)	9/9604*α2	12/2401*α2+3/686*α	1/196-2/2401*α2+13/343*α	3/49-66/2401*α2+27/343*α	12/49+15/4802*α2-33/686*α	37/98+124/2401*α2-123/686*α	12/49-42/2401*α2-3/343*α	3/49-78/2401*α2+33/343*α	1/196+169/9604*α2+13/686*α
AAAaaaaa×AAaaaaaa	2PAAAaaaa(t)PAAaaaaaa(t)	3/19208*α2	11/4802*α2+1/2744*α	51/9604*α2+9/686*α	3/196-33/2401*α2+45/686*α	13/98-65/2401*α2+131/2744*α	69/196+243/4802*α2-447/2744*α	69/196+153/9604*α2-147/1372*α	13/98-134/2401*α2+141/1372*α	3/196+429/19208*α2+11/2744*α
AAAaaaaa×Aaaaaaaa	2PAAAaaaaaa(t)PAaaaaaaa(t)	0	0	3/686*α2	1/343*α2+5/196*α	1/28-25/686*α2+19/196*α	1/4+10/343*α2-1/14*α	3/7+25/686*α2-17/98*α	1/4-19/343*α2+9/196*α	1/28+13/686*α2+15/196*α
AAAaaaaa×aaaaaaaa	2PAAAaaaaa(t)Paaaaaaaa(t)	0	0	0	0	3/98*α	1/14+4/49*α	3/7-6/49*α	3/7-6/49*α	1/14+13/98*α
AAaaaaaa×AAaaaaaa	PAAaaaaaa2(t)	1/38416*α2	3/4802*α2	39/9604*α2+3/1372*α	5/4802*α2+11/343*α	9/196-573/19208*α2+117/1372*α	12/49+3/686*α2-18/343*α	41/98+775/9604*α2-299/1372*α	12/49-429/4802*α2+27/343*α	9/196+1089/38416*α2+99/1372*α
AAaaaaaa×Aaaaaaaa	2PAAaaaaa(t)PAaaaaaa(t)	0	0	1/1372*α2	5/686*α2+1/392*α	(-17/1372)*α2+25/392*α	3/28-13/343*α2+13/196*α	11/28+143/1372*α2-43/196*α	11/28-59/686*α2-11/392*α	3/28+33/1372*α2+45/392*α
AAaaaaaa×aaaaaaaa	2PAAaaaaa(t)Paaaaaaaa(t)	0	0	0	0	1/196*α	3/49*α	3/14+3/98*α	4/7-13/49*α	3/14+33/196*α
Aaaaaaaa×Aaaaaaaa	PAaaaaaaa2(t)	0	0	0	0	1/49*α2	(-4/49)*α2+1/7*α	1/4+6/49*α2-1/7*α	1/2-4/49*α2-1/7*α	1/4+1/49*α2+1/7*α
Aaaaaaaa×aaaaaaaa	2PAaaaaaa(t)Paaaaaaaa(t)	0	0	0	0	0	0	1/7*α	1/2-2/7*α	1/2+1/7*α
aaaaaaaa×aaaaaaaa	Paaaaaaaa2(t)	0	0	0	0	0	0	0	0	1
Offspring Genotype Frequency		PAAAAAAAA(t+1)	PAAAAAAAa(t+1)	PAAAAAAaa(t+1)	PAAAAAaaa(t+1)	PAAAAaaaa(t+1)	PAAAaaaaa(t+1)	PAAaaaaaa(t+1)	PAaaaaaaa(t+1)	Paaaaaaaa(t+1)
